# Supplementary material
Source: PubMed Central journal article supplement (PMC2926303)
Supplement: NIHMS210649-supplement-02.pdf [file NIHMS210649-supplement-02.pdf]

**A**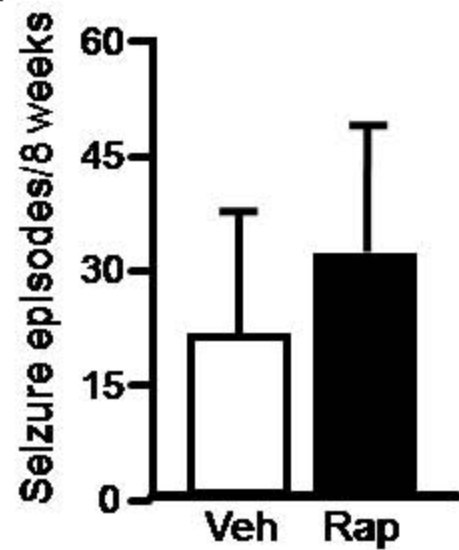**B**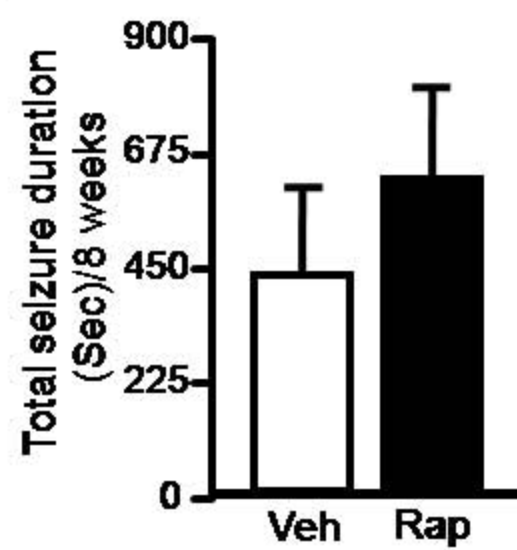

### Seizure severity after rapamycin treatment for three weeks

|                   | Vehicle            | rapamycin          |
|-------------------|--------------------|--------------------|
| Stages of seizure | Seizure events/rat | Seizure events/rat |
| Level 1           | 0.6                | 0.3                |
| Level 2           | 0.14               | 0.4                |
| Level 3           | 14.8               | 0.9                |
| Level 4           | 11.1               | 0.5                |
| Level 5           | 11.6               | 0.5                |

### Seizure severity after rapamycin treatment for five days

|                   | Vehicle            | rapamycin          |
|-------------------|--------------------|--------------------|
| Stages of seizure | Seizure events/rat | Seizure events/rat |
| Level 1           | 0.1                | 0                  |
| Level 2           | 0.3                | 0.1                |
| Level 3           | 1.6                | 0.3                |
| Level 4           | 1.4                | 0                  |
| Level 5           | 4.6                | 0.2                |
